# Supplementary material for: Species traits and connectivity constrain stochastic community re-assembly
Source: PubMed Central journal article supplement (PMC5663852; doi:10.1038/s41598-017-14774-2), 2017-10-31
Supplement: 41598_2017_14774_MOESM1_ESM.pdf [file 41598_2017_14774_MOESM1_ESM.pdf]

## Supporting Information

### Species traits and connectivity constrain stochastic community re-assembly

Rebecca E. Holt, Christopher J. Brown, Thomas A. Schlacher, Fran Sheldon, Stephen R. Balcombe and Rod M. Connolly.

Table S1. Fish species found in waterholes included within this study of the Cooper Creek, and number of waterholes occupied by those species in the 8 sampling times from April 01 to December 2004.

| Species                                           | Common Name                    | No. of waterholes occupied (max = 4) |         |        |        |        |        |        |        |
|---------------------------------------------------|--------------------------------|--------------------------------------|---------|--------|--------|--------|--------|--------|--------|
|                                                   |                                | Apr 01                               | Sept 01 | Oct 02 | May 03 | Mar 04 | Jun 04 | Oct 04 | Dec 04 |
| <i>Ambassis</i> sp.                               | Northwest ambassis             | 3                                    | 2       | 2      | 1      | 1      | 1      | 2      | 2      |
| <i>Bidyanus welcii</i>                            | Welch's grunter (Silver bream) | 2                                    | 0       | 0      | 1      | 3      | 2      | 0      | 1      |
| <i>Carassius auratus</i>                          | Goldfish                       | 3                                    | 4       | 2      | 0      | 0      | 0      | 1      | 0      |
| <i>Gambusia holbrooki</i>                         | Mosquitofish                   | 0                                    | 0       | 0      | 2      | 1      | 0      | 0      | 0      |
| <i>Hypseleotris</i> sp.                           | Carp gudgeons                  | 2                                    | 0       | 1      | 2      | 1      | 2      | 2      | 3      |
| <i>Leiopetherapon unicolor</i>                    | Spangled perch                 | 4                                    | 3       | 4      | 1      | 4      | 4      | 4      | 3      |
| <i>Macquaria</i> sp.                              | Lake Eyre golden perch         | 4                                    | 3       | 3      | 4      | 4      | 4      | 4      | 3      |
| <i>Melanotaenia splendida</i> subsp. <i>Tatei</i> | Desert rainbowfish             | 4                                    | 3       | 3      | 4      | 4      | 4      | 3      | 2      |
| <i>Nematalosa erebi</i>                           | Bony bream                     | 3                                    | 2       | 3      | 3      | 3      | 3      | 3      | 2      |
| <i>Neosilurooides cooperensis</i>                 | Cooper Creek tandan            | 2                                    | 0       | 2      | 0      | 3      | 2      | 1      | 1      |
| <i>Neosilurus hyrtlii</i>                         | Hyrtl's tandan                 | 4                                    | 4       | 4      | 2      | 4      | 4      | 4      | 3      |
| <i>Porochilus argenteus</i>                       | Silver tandan                  | 4                                    | 4       | 4      | 4      | 4      | 4      | 4      | 3      |
| <i>Retropinna semoni</i>                          | Australian smelt               | 2                                    | 2       | 2      | 4      | 2      | 2      | 4      | 2      |
| <i>Scortum barcoo</i>                             | Barcoo grunter                 | 4                                    | 2       | 0      | 2      | 4      | 3      | 2      | 1      |

Table S2. Physical and hydrological characteristics measured at Cooper Creek.

| Floodplain characteristics                  | Acronym | Units  | Description                                                                                                   |
|---------------------------------------------|---------|--------|---------------------------------------------------------------------------------------------------------------|
| River flow at time of sampling              | RF      | ML/day | Cooper creek flow and flood data, Bureau of Meterology.                                                       |
| Straight line distance to nearest waterhole | SLD*    | km     | Distance to the nearest waterhole within the surrounding flood plain network (Arthington <i>et al.</i> 2005). |
| Time since last flood                       | TSLF    | Months | Period of drought in area of study since last flood                                                           |

\*Quantified during April 2000 original sampling trip (See Arthington *et al.* 2005), SLD was used as the metric for landscape connectivity, describing the proximity to the nearest waterhole surrounding the floodplain network.

Table S3. Species traits quantified for 14 freshwater fish species.

| Fish Species Trait                                            | Description                                                                |
|---------------------------------------------------------------|----------------------------------------------------------------------------|
| Age at maturity (months)                                      | Mean age at maturation                                                     |
| Body size (cm)                                                | Standard length*                                                           |
| Conductivity ( $\mu\text{S}\cdot\text{cm}^{-1}$ )             | Conductivity tolerance                                                     |
| Dispersal category                                            | Defines a species vagility                                                 |
| Dissolved oxygen tolerance ( $\text{O}_2 \text{ mg L}^{-3}$ ) | Dissolved oxygen tolerance                                                 |
| Egg size (mm)                                                 | Mean diameter of mature (fully yolked) ovarian oocyte                      |
| Fecundity                                                     | Total fecundity, no. of eggs or offspring per breeding season              |
| Length at maturity (cm)                                       | Mean length at maturation                                                  |
| Longevity (years)                                             | Maximum potential lifespan                                                 |
| Maximum length (cm)                                           | Maximum body length                                                        |
| Parental Care                                                 | Category representing whether they perform parental care or not            |
| pH                                                            | pH tolerance                                                               |
| Spawning category                                             | Single spawning per season, batch / repeat / protracted spawner per season |
| Temperature ( $^{\circ}\text{C}$ )                            | Temperature tolerance                                                      |
| Time to hatch (days)                                          | Time to egg hatch.                                                         |
| Turbidity (NTU)                                               | Turbidity tolerance                                                        |

\*Standard length is measured from the tip of the snout to the posterior end of the last vertebra, excluding the length of the caudal fin.

Where trait information was unknown for lesser known species, proxy species that are ecologically similar were used; *Tandanus tandanus* was used for *Neosilurooides cooperensis* and *Scortum parviceps* for *Scortum barcoo* (S. Balcombe, pers.comm.). Ecologically similar species in this case are defined as a phylogenetically bounded group of species that use a similar set of resources within a community (Fauth *et al.* 1996).

Table. S4. Summary of generalised linear mixed effect model (GLMM) comparisons using Akaike's Information Criterion (AIC).

| Model Structure                                                                  | AIC    |
|----------------------------------------------------------------------------------|--------|
| Dissolved oxygen tolerance + fecundity + dispersal category                      | 522.2* |
| Dissolved oxygen tolerance + fecundity                                           | 549.1  |
| Dissolved oxygen tolerance                                                       | 561.0  |
| Dissolved oxygen tolerance + fecundity + dispersal category + pH                 | 587.6  |
| Dissolved oxygen tolerance + fecundity + dispersal category + conductivity       | 588.4  |
| Dissolved oxygen tolerance + fecundity + dispersal category + turbidity          | 574.0  |
| Dissolved oxygen tolerance + fecundity + dispersal category + egg size           | 584.0  |
| Dissolved oxygen tolerance + fecundity + dispersal category + age at maturity    | 576.2  |
| Dissolved oxygen tolerance + fecundity + dispersal category + body size          | 580.9  |
| Dissolved oxygen tolerance + fecundity + dispersal category + length at maturity | 602.5  |
| Dissolved oxygen tolerance + fecundity + dispersal category + longevity          | 649.8  |
| Dissolved oxygen tolerance + fecundity + dispersal category + maximum length     | 656.3  |
| Dissolved oxygen tolerance + fecundity + dispersal category + parental care      | 684.9  |
| Dissolved oxygen tolerance + fecundity + dispersal category + spawning category  | 647.2  |
| Dissolved oxygen tolerance + fecundity + dispersal category + temperature        | 616.5  |
| Dissolved oxygen tolerance + fecundity + dispersal category + time to hatch      | 678.0  |

\*Final model structure

Table. S5. Trait manipulation matrix

| Trait manipulation scenario            | Original value | Manipulated value |
|----------------------------------------|----------------|-------------------|
| Low tolerance to low dissolved oxygen  | 3              | 1                 |
| High tolerance to low dissolved oxygen | 1              | 3                 |
| High dispersal ability                 | 1              | 3                 |
| Low dispersal ability                  | 3              | 1                 |
| Low total fecundity                    | 3, 4, 5        | 1                 |
| High total fecundity                   | 1, 2, 3        | 4, 5              |

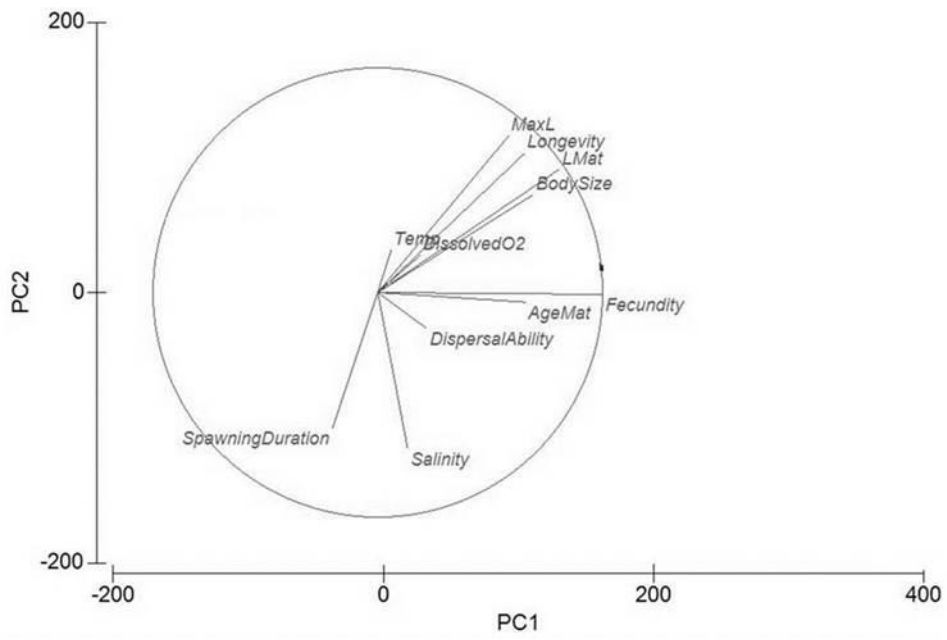

Figure S1. PCA analysis showing the distribution of species traits and fish species included in analyses. PC1, 97.3 % variation. PC2, 98.7% % variation.
